# Supplementary material for: Improving prediction of particle size with a novel acoustic bedload monitoring system consisting of phased microphone arrays and accelerometer
Source: Copernicus journal article supplement (doi:10.5194/egusphere-2024-2525), 2024-09-23
Supplement: Supplementary file [file egusphere-2024-2525-AC2-supplement.pdf]

**Manuscript ID:** egusphere-2024-2525

**Original Title:** *Improving prediction of particle size with a novel acoustic bedload monitoring system consisting of phased microphone arrays and accelerometer*

**Authors:** Zheng Chen et al.

Dear Reviewer #2,

We sincerely thank you for your constructive and insightful comments on our manuscript. This feedback has helped us to significantly improve the quality, clarity, and structure of the manuscript. In response to the reviewers' comments, we have thoroughly revised the original manuscript.

Below, we provide a detailed point-by-point response to each comment. All changes in the revised manuscript are highlighted for clarity.

### **Responses to the Comments from Reviewer #2**

- **General comment 1:** The manuscript by Chen et al. presents a novel approach to river bedload monitoring using a phased acoustic array together with an accelerometer sensor built into a modified version of a Swiss Plate Geophone casing. The study aims to locate bed particles on the cover plate of the device and exploits the wave train content to estimate the particle size. The team presents laboratory aided tests of the principle and performance of the system and compares the results with earlier experiments using the "classic" Swiss Plate Geophone devices.

The study addresses a relevant and timely topic, suggesting indeed a possible step forward in the field of continuous bedload transport research, going beyond what existing approaches can deliver. The concept of using a phased array appears overall suitable to be enrolled for such a customised case. That said, I feel the study remains somewhat premature and incomplete in the methods and tests it presents and is likewise in a not very organised structure in terms of writing and figure design, which prevents the reader from clearly grasping the line of arguments.

**Response:** Thank you for your thorough overall assessment of our manuscript. We are encouraged by your recognition that the proposed PMA system represents a significant advancement in the field of continuous bedload transport monitoring and providing improvements on existing impact-based approaches.

We also acknowledge your concerns regarding the immaturity of the methods and the partially unclear structure of the manuscript. In response, we have made substantial revisions to improve the clarity, organization, and presentation throughout the manuscript. Specifically:

We have restructured the Results and Discussion sections to provide a clearer logical flow and better alignment with the experimental design and key outcomes (see revised Sections 3 and 4). The figures and their captions have been revised for clarity, conciseness, and to reduce redundancy with the main text (e.g., Figures 6, 7, and 8); We have improved the language and reduced ambiguity, particularly in the Methods sections, to which we have also added missing details (e.g., sensor specifications, modeling assumptions, and signal processing parameters). In addition, we have added a more forward-looking and integrative Conclusion (Section 5), which more clearly articulates the contributions of this study and how it addresses the core research questions.

We would like to express our sincere appreciation for your critical feedback, which has helped us to significantly improve the clarity and scientific communication of the manuscript.

● **General  
comment 2:**

I see a main unknown and potential flaw in the design to relate impact amplitudes with grain size while keeping the drop height for each particle somewhat constant. It is hard for me to imagine how under natural conditions there will be constant drop heights for particles of varying size. Or, the other way around, how would the approach successfully estimate the correct grain size if river bed particles hit the instrument with different fall velocities and overall differing horizontal velocity vectors? What about those particles that rather slide and roll instead of jumping? These fundamental questions are neither raised nor implicitly addressed by the study, neither in the experiment design nor in the argumentation.

In writing “somewhat constant” in the above paragraph, I wonder why the height of centre of mass of the particles above the plate was kept constant instead of keeping the full vertical drop height constant. This adds a further unnecessary (or unexplained) variable that changes the experiment results.

**Response:**

This is an important comment. We agree that the relationship between impact signal characteristics and particle size is not only influenced by mass, but also by impact velocity and the motion mode (e.g., rolling, sliding, saltation). We would like to clarify and expand on our rationale and methodology regarding this issue.

First, the approach of establishing a correlation between the impact signal amplitude and the particle size is widely used and physically grounded in bedload surrogate sensing. This relationship has been demonstrated by many previous studies, including *Wyss et al. (2016a)* and *Mao et al. (2018)*, where larger particles typically generate higher signal amplitudes due to their greater momentum and impact energy. Our results are consistent with this expectation.

Second, we have indeed explored the role of impact velocity in our experiments. Although impact velocity does affect the signal amplitude, our laboratory tests show that its influence is less significant than that of particle size. Similar conclusions were reported by *Wyss et al. (2016a, WRR)*, who demonstrated that increases in flow velocity (and thus increasing particle impact velocity) led to only modest increases in signal amplitude of the SPG system across particle sizes (see Figure 6 from *Wyss et al. (2016a)*, attached below for reference).

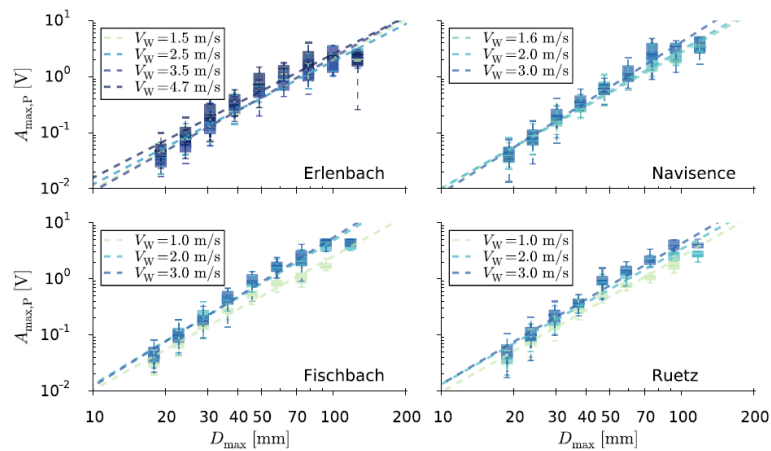

Figure 6 in *Wyss et al. (2016a)*. Maximum amplitude of a packet  $A_{max,p}$  as a function of mean particle-size  $D_m$ , for different mean flow velocities  $V_w$

In our experiments, we controlled the **drop height based on the particle's center of mass**, resulting in slightly different release heights for particles of different sizes. This design choice was not intended to mimic any specific natural condition, but rather to ensure consistency with previous laboratory calibration studies of SPG systems (*Chen et al.*, 2022, JHR), allowing meaningful comparisons to be made across technologies. Moreover, under a fixed center-of-mass drop height, smaller particles do indeed reach slightly higher impact velocities than larger particles. This matches the common trend observed in natural settings whereby smaller bedload particles tend to move faster than larger ones under the same flow and bedload slope conditions. We have added a note to the manuscript to clarify this point.

We agree that the variability in natural particle motion—sliding, rolling, or bouncing—adds further complexity. This study focuses on vertical impacts under controlled conditions, which is a necessary first step towards system calibration. In our earlier research (*Chen et al.*, 2022), we explored signal characteristics under different transport modes. We demonstrated that saltation and sliding events can be distinguished using acoustic parameters, such as packet duration and frequency content. These insights will be incorporated into future system calibrations under flume and field conditions.

Finally, the main objective of this study was not to reconstruct every aspect of natural motion, but rather to address a **key source of uncertainty in impact-based systems**: the variability introduced by eccentric impacts on the system plate. Our results show that shifting from centric to eccentric impact positions can reduce signal amplitude by approximately 40% for a given particle size, significantly affecting calibration reliability. The proposed phased microphone array (PMA) system directly addresses this issue by enabling source localization and paving the way for the correction such spatial effects in future field deployments. A more detailed discussion of particle size estimation is included in the updated Sect. 4.4, “Improved estimation of particle size, outlook to field application”

We have revised the manuscript accordingly to better explain the points just mentioned.

● **General comment 3:**

Another, major flaw arises from the inability to locate and quantify the effects of multiple particles being in contact with the plate. As nice as it is to isolate single impacts, under natural conditions the norm will be to experience multiple impacts during a bedload transport period, even during the time window for which the first pulse of an impact signal is collected. If it is impossible to reliably locate two or more sources at a time, it will also be impossible to extract reliable information on the particle size and hence the envisioned total bedload flux across the sensor plate. I might have missed some detail in reading the manuscript but from the results section (e.g. Fig. 7) it seems that the two synchronous impacts cannot be deciphered, as one would expect from the capabilities of a phased array setup, and as is discussed in the manuscript further down.

**Response:**

We thank the reviewer for highlighting this crucial aspect of real-world application—namely, the occurrence of multiple simultaneous or near-simultaneous particle impacts. We agree that resolving multiple acoustic sources is essential for accurately quantifying bedload transport, we would therefore like to clarify the capabilities and current limitations of the proposed PMA system in this regard.

As described in Sections 2.4.3 and 3.1.3 of the manuscript, the PMA system is indeed capable of identifying and localizing multiple sound sources that are activated simultaneously. This is one of the fundamental advantages of beamforming-based phased array processing.

However, spatial resolution limits do apply. Specifically, when two impacts occur too close to each other (i.e., within a few centimeters), the resulting acoustic source image will show a merged peak, making it difficult to distinguish the impacts as separate events. This resolution threshold has been quantified through numerical simulations: under our current sensor layout and signal frequency band, the spatial resolution is approximately 12 cm.

Importantly, this spatial resolution is not fixed. It can be improved by increasing the number of microphone elements, optimizing array geometry, or extending the signal bandwidth. Of course, such improvements entail trade-offs in terms of system cost, complexity, and computational load. These factors will be taken into account in our future design iterations. In response to your comment (as well as specific comments 17, 18 and 20), we have conducted additional numerical tests involving three and four simultaneous sources in different spatial arrangements. These results are now presented in the Appendix B, and their implications are discussed in Sect. 4.3.

We acknowledge the reviewer's concern regarding the possible occurrence of *multiple simultaneous impacts under natural conditions*. Previous work by Wyss *et al.* (2016, JHE) quantified the probability of overlapping impact signals using the time ratio  $z_p$ . Their analysis (Fig. 12, also presented below for reference) showed that for transport rates  $q_s$  smaller than  $\sim 5$  kg/s/m,  $z_p$  values are typically below 1, indicating that simultaneous impacts are unlikely and single-particle signals can be reliably isolated. Only for intensive transport rates, such as those exceeding  $\sim 100$  kg/s/m reported for the Erlenbach site (Hegg and Rickenmann, 1999), the value of  $z_p$  is expected to be close to 1, in which case the number of identified packets from the geophone signal may not deliver accurate measurements.

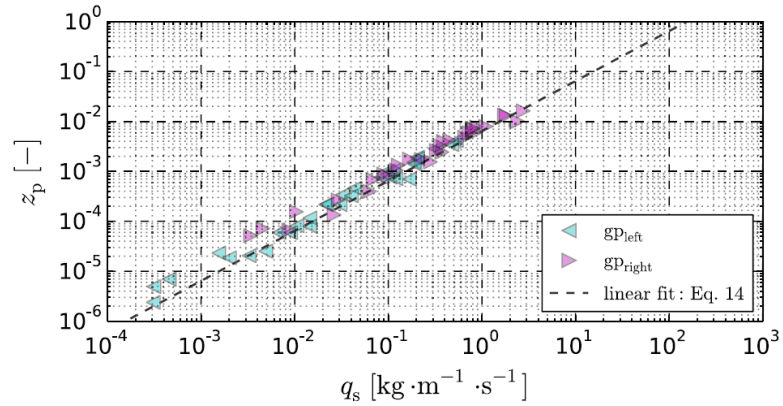

Figure 12 in Wyss *et al.*, (2016, JHE).  $z_p$  ratio of the left and the right central geophone plates ( $gp_{left}$  and  $gp_{right}$ ) as a function of unit bed load transport rate

We also recognize that real-world bedload transport involves not only discrete point impacts but also tangential sliding and rolling motions that produce spatially extended or moving acoustic sources. While the current study focuses on static or instantaneous point sources, we are actively exploring methods to detect and characterize dynamic source patterns (e.g., migrating impact signatures), which may enable differentiation between saltation, rolling, and sliding events. This will be a central focus of our upcoming flume experiments and algorithm development efforts.

Finally, we would emphasize that the present study is a critical first step: it demonstrates the feasibility of localizing particle impacts with a compact PMA array while also highlighting the importance of spatial impact variability—a known source of uncertainty in previous systems. By

enabling localization, the PMA system provides a framework for correcting eccentricity-induced amplitude distortions and eventually integrating spatially distributed impact information under multi-source conditions.

We have revised the manuscript in accordance with the above points to provide a clearer explanation of the capabilities, limitations, and future research directions related to multi-source detection.

- **General comment 4:** The text contains numerous grammatical glitches, equivocal wording occasions, unclear terminology, and cluttered graphics. I list some of those issues in my detailed comments but think the manuscript is not yet at a stage where a fine screen of such improvements makes sense. I suggest to pay due attention to improvements of the presentation quality of the study both in terms of writing and graphical art.

There are several occasions when the text mixes up theory, methods, results and/or discussion and hence requires reorganisation to be consistent. See details below for examples.

Many figures are awkward to read/interpret. Especially the insets of the reference data (Wyss et al.) make any comparison virtually impossible. Likewise, the semantics of the figures not always add up, which is when I would suggest to split figures to maintain consistent pieces of information rather than collections of fragmented information. See details for examples.

**Response:** We thank the reviewer for detailed comments regarding the quality of overall presentation, including language, structure, and design of figures. We acknowledge that clear communication is essential to ensure the accessibility and reproducibility of our work. We agree that the manuscript requires significant improvement in this regard.

In response, we have carefully revised the entire manuscript to enhance its clarity, consistency, and scientific organization. Specific improvements include:

- Rewriting key paragraphs to ensure that background information, methods and results are not mixed within the same sections.;
- Clarifying terminology and improving sentence structure throughout the text;
- Systematically reworking several figures to improve layout and label readability;
- Splitting or restructuring multi-part figures where necessary to ensure consistency of information per figure.

We also plan to conduct a final round of professional language editing after the manuscript has been revised, in order to further refine it prior to resubmission. We hope that these efforts will substantially improve the quality and clarity of the work.

- **Specific comment 1:** Detailed comments  
1. 90-92, in the sensor description section it would help to give more detail on the device characteristics apart from the manufacturer and type ID, e.g. frequency range, sensitivity, digitizer sampling depth, and so on.

**Response:** Thank you for this helpful suggestion. In response, we have revised the sensor description section (original lines 89–103) to include key technical details. These include the frequency response range and sensitivity of both the microphone and the accelerometer, as well as the sampling rate and bit resolution of the digitizer. These specifications are now clearly stated in the revised manuscript to support better interpretation of the sensor signals and system performance.

- **Specific comment 2:** 1. 108, 2.2 10<sup>1</sup> kg means 22 kg. Check values

**Response:** Thank you for pointing out this error. You are correct - the value should be 2.2 kg, not 2.2×10<sup>1</sup> kg. We have corrected this mistake in the revised manuscript.
- **Specific comment 3:** Fig. 2, why are there so few validation drop locations and overall, why were not more locations used further towards the margin of the plate? It seem quite unlikely that only the central 2/3 of the plate would be impacted by moving bed particles, and the edge effects appear to be quite significant according to the study results.

**Response:** Thank you for this comment. We agree that, under natural bedload transport conditions, particle impacts may occur over the full plate area, including marginal regions. In this study, we designed a total of **16 impact positions** arranged in a 4×4 matrix across the PMA plate surface (see Fig. 2b), with about 900 individual impact experiments conducted using seven particle size classes. For each test, high-speed video (captured at thousands of frames per second) was used to record the entire impact process. Impact velocity and particle trajectories were extracted frame-by-frame using image analysis algorithms, with key frames—particularly those before and after contact—manually checked to ensure accuracy. Due to the extremely high frame rate and data volume, this workflow is computationally and manually intensive. Therefore, the current experimental design represents a practical compromise between spatial resolution, statistical reliability, and data-processing feasibility.

To address spatial signal variability, we intentionally selected impact positions that cover a wide range of eccentricity distances (0–233 mm). These positions included both centric and highly eccentric locations, all of which were well within the PMA system's effective impact area. The validation positions were also chosen to span both moderate and larger offsets, ensuring that the proposed correction method for eccentricity-induced amplitude bias could be reliably tested.

We acknowledge that further expansion of the test locations—especially towards the extreme edges of the plate—could help refine the calibration model under more extreme boundary conditions. However, as discussed in Sect. 4.4 of the revised text (original Sect. 4.1) and as illustrated in Fig. 11 and Fig. 12, our proposed model has already demonstrated effective performance in reconstructing sound source positions and in correcting for eccentricity effects across the designed test domain. Importantly, Fig. 13 shows that using the inversion-derived source coordinates leads to a significant improvement in particle size estimation, even for highly eccentric positions.

In future work, we plan to explore two complementary strategies to further address edge-effect challenges: (i) **adding more edge-positioned impact points** through targeted testing, and (ii) using **finite element simulations** to extend the spatial response analysis to untested positions beyond the current experimental layout. This will allow us to better characterize the dynamic behavior at the boundaries without greatly increasing experimental effort.

We have added a clarification in the revised manuscript (Sect. 4.4) to reflect these points and acknowledge the edge-effect implications more explicitly.
- **Specific comment 4:** The derivation/description of the beam forming technique seems to be or will at least be based on numerous references representing work of generations of scientists. Yet, there is only a single reference included. I suggest the authors give proper credit to the scientists that have built the



physical concept, mathematical framework and perhaps computational implementation of the routine – unless all this has indeed been developed by the authors of this study.

**Response:** We appreciate your reminder. In the revised manuscript, we have added several key references that reflect the development of its physical principles, mathematical formulations, and computational implementation. These include foundational works in array processing theory (e.g., Merino-Martínez et al., 2019; Brandstein and Ward, 2001), its application in acoustic source localization (e.g., Brooks and Humphreys, 2006; Schmidt, 1982), and practical implementations relevant to geophysical monitoring.

● **Specific comment 5:**

Fig. 3 d,  $R_s$  needs to be defined

**Response:** We agree that the definition of  $R_s$  should be made more accessible to readers when interpreting Fig. 3d. Although it is defined in the main text (original lines 193–195), we have now added a brief explanation to the figure caption for clarity.

We have also ensured consistency in the choice of resolution threshold (30% of the peak value) across all relevant figures. However, Fig. 12 presents both the 30% and 10% definitions for comparison.

● **Specific comment 6:**

l. 169, the heading (simulation) does not depict what the text below refers to (construction details)

**Response:** The original subsection heading “Numerical simulation procedure” did not fully reflect the content that follows, which includes both model assumptions and setup details. We have revised the heading to better reflect the section’s scope, which now reads “Numerical simulation setup” in the revised manuscript.

● **Specific comment 7:**

l. 171, 3D grid does not make sense, either it is a grid (2D) or a 3D structure (voxels, cube). Also, pixels is a grid-world term while nodes is a vector-based term. This (and other occasions) need to be corrected throughout.

**Response:** Thank you for this clarification. In the revised manuscript, we now refer to a 3D volumetric domain that would require discretization into voxels for full 3D source reconstruction. Since our study adopts a 2D surface scanning approach, we consistently use the term “nodes” to describe the discrete sampling points over the 2D scanning plane.

We have revised the text accordingly to reflect accurate terminology throughout this section.

● **Specific comment 8:**

l. 184, the equation provides rather trivial information, consider removing it

**Response:** Agreed. Accordingly, we have removed Eq. (11) and described the grid resolution in the revised manuscript.

● **Specific comment 9:**

l. 194-196, this is more about phased array theory than actual methods employed in this study. Consider moving this to the introduction

**Response:** We agree that the original paragraph in lines 194–196 included general theoretical information about phased array beam patterns, which may be better suited for background. However, since the definition of array resolution  $R_s$  is a key parameter used in our signal evaluation (e.g., in Fig.

5e, Fig. 6e, and Fig. 12), we have retained the definition in the methods section but have revised the paragraph to be more concise and focused on the specific implementation adopted in this study.

- **Specific comment 10:** **Response:** I. 199-204, there are some references needed to support the statements in this section

Agreed. In the revised manuscript, we have added relevant citations to foundational works in array signal processing (e.g., Flanagan, 1985; Brandstein and Ward, 2001) that cover the effects of sensor spacing and frequency on beam pattern sharpness and aliasing. These citations provide theoretical support for the design considerations described in this section.
- **Specific comment 11:** **Response:** I. 600, “allowing the spatial location”, yes but only when a single impact is isolated, which I think will be of little help under real world conditions.

Thank you for this comment. To avoid overstatement, we have revised the sentence in the revised manuscript.

Specifically, we now clarify that spatial localization is feasible primarily under isolated or sparsely distributed impact conditions. We also refer to our resolution analysis, which quantifies the system’s spatial resolution ( $\sim 12$  cm) for closely spaced sources under the current configuration.
- **Specific comment 12:** **Response:** I. 204-209, there is some rather trivial information that might be better placed in a general introduction (or just skipped) rather than being an actual topic of “Microphone elements arrangement”.

We thank the reviewer for the suggestion. The paragraph in question was originally intended to explain the rationale behind the design of the microphone spacing in the PMA system during numerical simulations, based on the Nyquist sampling criterion. Specifically, we assumed a representative signal frequency of 1600 Hz for simulation purposes, which corresponds to the characteristic frequency observed in the experimental results for the tested particle size class. Based on this frequency, the upper limit for microphone spacing was calculated. This design parameter is directly relevant to the beamforming performance of the system and thus was included in the section on microphone array configuration.

To improve clarity and avoid unnecessary detail, we have now revised the paragraph to streamline the description. Additionally, we retained the reference to Table 2 in the methods section, where the simulation parameters (including angular frequency and wave number) are summarized and first introduced in the context of the numerical beamforming model.

We hope this revised presentation better contextualizes the design rationale without overloading the section with technical derivations.
- **Specific comment 13:** **Response:** I. 213, why a sine wave and not the more likely to expect pulse signal? Can you explain/justify this? Will this decision not affect the validity of the test outputs with respect to the envisioned natural settings?

We appreciate the reviewer’s thoughtful question regarding the choice of input waveform in the numerical tests. The use of a periodic cosine (or sine) wave was a deliberate decision based on both practical and physical considerations.



First, from a modeling standpoint, a periodic sine wave offers precise control over the signal frequency, which is crucial for evaluating the performance of the beamforming algorithm under varying array configurations (e.g., sensor spacing, number of elements, and multi-source scenarios). This allows us to isolate the influence of array design on spatial localization accuracy in a controlled manner, independently of complex signal shapes or broadband spectra.

Second, the sine waveform is also physically justifiable. Impact-induced acoustic signals recorded in our laboratory experiments often exhibit an initial phase of high-frequency oscillation that closely resembles a few cycles of waveform. As shown in Fig. 4d, the impact-induced signals recorded by a microphone element in our laboratory display an initial phase of rapid oscillation lasting 1–3 ms. These oscillations result from the short-duration contact between the particle and plate and are affected by particle size, contact stiffness, and impact dynamics. Similar behaviors have been reported in SPG system data and in finite element simulations (*Chen et al.*, 2022 <https://doi.org/10.1080/00221686.2022.2059585>), supporting the physical relevance of our waveform choice.

Furthermore, the half-sine pulse is widely recognized as a classical form of mechanical shock loading in standards such as IEC 60068-2-27. Our use of a short-duration periodic cosine wave can be seen as an idealized extension of this fundamental pulse type for the purpose of numerical analysis.

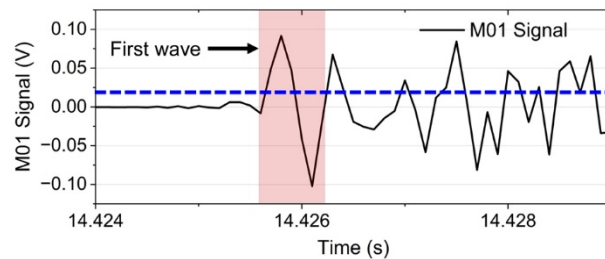

Figure 4(d) in the main text. Illustration of the first wave of the microphone signal.

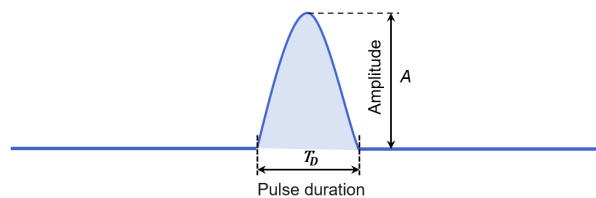

Figure: The half-sine pulse

We agree that an impulse-type input could also be used in such simulations, and it may better reflect certain broadband aspects of real-world signals. However, we believe this difference in source waveform has limited impact on the key findings of this study, which primarily focus on the system's ability to localize and reconstruct acoustic sources using beamforming principles. Most importantly, the PMA system is not solely evaluated based on simulations—its performance is being validated through extensive physical tests, including controlled drop experiments and future flume and field applications, which will incorporate the full complexity of natural impact signals.

We have added clarification to this point in the revised manuscript (see Sect. 2.4.3).

- Specific comment 14:** l. 214, why adding white noise? Can you justify, both why adding noise first of all and then also why specifically white noise? I would rather expect to see red noise or some derivative of it to

better reflect “real” conditions.

**Response:** Thank you for the insightful comment. In the numerical tests, we added white Gaussian noise to the synthetic signals received by each microphone element to simulate moderate noise contamination and evaluate the robustness of the beamforming algorithm under non-ideal conditions. The choice of white noise with an SNR of 10 follows a common practice in signal processing and seismological inversion studies, where white noise is used to test algorithmic stability and sensitivity due to its flat spectral content.

We agree that actual ambient noise in fluvial or field environments may be better represented by colored noise such as red or pink noise, which typically exhibits stronger low-frequency components. However, the goal of this test was not to simulate field noise conditions, but rather to introduce a controlled perturbation to assess spatial resolution under noise. Future simulations may incorporate more realistic noise structures as we expand the modeling to more complex field scenarios.

We have added statements in the revised manuscript.

- **Specific comment 15:** [l. 224, replace “centric” by “central”](#)  
[l. 224, why indexing a repeat experiment run?](#)

**Response:** Agreed. We have replaced the term “centric” with “central” in this sentence to follow standard technical usage. Regarding the indexing of the microphone and impact location (e.g., M05 and 1.4), these were intended to refer to the sensor ID and the specific impact location in the impact matrix shown in Fig. 2b. We have clarified the wording to ensure this is more intuitive and removed unnecessary indexing from the sentence where appropriate.

- **Specific comment 16:** [Fig. 6, it would help quite a bit if the panels a-d would indicate the locations of the sensors on the coloured matrices, instead of having to look for Appendix A to get that information.](#)

**Response:** Agreed. We appreciate that both you and Reviewer #1 identified the need for clearer visualization of sensor locations in Figure 6. In response, we have revised Figure 6a–d to directly overlay the microphone element positions on the acoustic source maps. This change eliminates the need to refer to Appendix A when interpreting the different array configurations and significantly improves figure readability.

- **Specific comment 17:** [Fig. 7, better split the figure into single impacts and multiple impacts. In addition, in \(a\) and \(b\) there are only two locations shown, in \(e\) there are three locations shown. Similar for c,d and f. Please resolve.](#)

**Response:** Agreed. In the revised manuscript, we have addressed this in two ways. First, we split the original Figure 7 into two separate figures: one for single-source scenarios and one for multi-source scenarios. This improves visual clarity and helps distinguish the objectives of each test. Second, we updated the subplots and captions to clearly indicate the number and spatial arrangement of the impact locations in each case.

We have conducted new simulations involving three and four simultaneous sources, which are now presented in the Appendix B. These additions further illustrate how the PMA system performs under more complex multi-source conditions. We believe these revisions enhance the clarity and completeness of the analysis.

- **Specific comment 18:** l. 309-310, I disagree with the statement that the locations agree well. This is just an artefact not a real two-source location. Actually we need proper tests here to show the real artefacts arising from the case of more than one impacting particle being relocated. What if two, three, four, ... particles impact at the same time? What is the effect of different locations (up-down, oblique, different distances from center)? Here I only see two sources horizontally symmetrically impacting the plate.

**Response:** Thank you for this critical feedback. We agree that the original two-source simulation presented a highly simplified and symmetric case, which does not fully represent the complexity of real-world multi-particle impact scenarios. In response to your suggestion, we have conducted additional numerical simulations involving three and four sources at varying spatial locations, including non-symmetric and off-center configurations. These results help to better illustrate the performance and limitations of the PMA beamforming algorithm under more realistic source interference conditions.

To keep the main manuscript focused, we have moved all multi-source simulation results to the Appendix B and expanded the corresponding discussion in the main text (Section 4.3) to reflect the key insights. These new tests demonstrate that the current system can distinguish multiple sources, but also highlight challenges in resolving closely spaced or overlapping sources. We thank you for encouraging this important clarification.
- **Specific comment 19:** l. 316, “indicating that the grain of the noises become weaker...”, this sentence does not make any sense to me

**Response:** Thank you for pointing out this unclear sentence. We have rephrased it to express the statement more clearly in the revised manuscript.
- **Specific comment 20:** l. 324-326, this is interpretation and should not occur in the results section. Albeit, what have we learnt from that exercise after all? We already know that a phased array cannot locate two synchronous signals from two different locations. Also, what does that imply (later in the discussion) for a real world case when multiple impacts happen?

**Response:** Thank you for raising this important point. In the revised manuscript, we have rephrased the original sentence to describe the observed beamforming output in neutral, data-driven terms, and we have moved the interpretation regarding spatial resolution limits to the Discussion section (Section 4.3).

Regarding the broader implication of this test, we acknowledge that the symmetric two-source configuration originally presented is simplified and does not fully represent the complexity of real-world bedload transport, where multiple impacts may occur simultaneously at varying distances and directions. In response to your comment (as well as general comment 3 and specific comment 18), we have conducted additional numerical tests involving three and four sources in non-symmetric, more realistic spatial arrangements. These results are now presented in the Appendix B, and their implications are discussed in Section 4.3.

While it is true that classical phased array beamforming cannot perfectly resolve multiple closely spaced sources, our simulations provide a first quantification of the spatial resolution limit ( $\sim 12$  cm) under the current system configuration. This information is crucial for designing future sensor layouts and for understanding the trade-offs involved in multi-source detection. We also note that this threshold is not fixed—it can be improved by using more microphone elements,

developing denser layouts, and including broader frequency content. We plan to explore these possibilities in upcoming system iterations and flume experiments.

- **Specific comment 21:** Fig. 8, any comparison with the inset data is not possible (also in figs. 9 and 10), please add those data points to the main chart, perhaps with clearly distinct colours. Perhaps add a small map that depicts the impact locations to prevent readers from searching back and forth to get the context right. Add the number of samples that are summarised in the box plots. Perhaps remove the x-axis line to make clear this is categorical data and not continuous, because at a first glance one could think the four box plots per diameter are a continuum of sizes. In summery, just make the job easier for readers to correctly interpret the figure.

**Response:** Thank you for your thoughtful suggestions regarding the clarity and interpretability of Figures 8–10. We have substantially revised Figures 8 and 9 based on your comments. Specifically, in Figures 8a and 9a, we replaced the previous boxplots with mean values and error bars (standard deviation) from repeated impact tests. These data are now plotted directly in log-log coordinates, making them easier to compare with previously published flume and field data (e.g., from *Wysse et al.*, 2016a and 2016c). This approach addresses your concern about inset readability by eliminating the need for a separate inset panel.

In addition, we added a small schematic within Figure 8b to illustrate the four impact locations used in the tests. This helps readers avoid having to refer back to earlier figures to understand the spatial context. Similar improvements have also been applied to Figures 9 and 10.

We hope these improvements enhance the readability and interpretability of these figures.

- **Specific comment 22:** l. 417-418, this should go to the methods section. In addition, why not just calculating the RMSE between real location and model derived location?  
l. 422, “suggesting a good agreement”, first this is interpretation and second it is a weak statement that can and should be quantified.

**Response:** Thank you for the constructive comment. We have moved the relevant description to the Methods section as suggested. In addition to the previously reported dimensionless accuracy ratio  $r_j^{m,t}$ , we have now computed the root mean square error (RMSE) between the estimated and true impact coordinates across test locations. The average RMSE was approximate 4 cm in the X direction and 3 cm in the Y direction, indicating good absolute localization accuracy under our current sensor configuration. These updates have been reflected in the revised manuscript.

It is also worth noting that this single-source localization accuracy (quantified via RMSE and dimensionless offset ratio) is conceptually distinct from the *spatial resolution* of the PMA system, that is, the minimum separation distance at which two simultaneous sources can be resolved. As shown in our multi-source simulations, this resolution is approximately 12 cm under the current sensor layout and signal conditions. Together, these metrics provide a more complete evaluation of the PMA system’s localization capability.

- **Specific comment 23:** l. 428, “boxes in green”, I see no green boxes at all

**Response:** Thank you for pointing this out. We have corrected this in the revised manuscript to “boxes in blue” which now accurately reflects the coloring used in the figure.

- **Specific comment 24:** l. 429, what are these values (30 % and 10 %) based on? Are these arbitrarily chosen or based on some reference or some physical meaning?

**Response:** The 30% and 10% thresholds used to characterize the beamwidth were chosen as empirical reference levels to complement the standard 3 dB definition. These values do not correspond to specific physical thresholds but were selected to explore the effect of stricter amplitude cutoffs on spatial localization estimates. The idea was to evaluate how the spatial extent of the main lobe changes under different amplitude criteria, which can be useful when assessing localization sensitivity or when noise levels vary.

We have clarified this in the revised manuscript.
- **Specific comment 25:** l. 445-446, this sentence needs some context in which it shall be embedded. Currently, it hangs in the air with no logic

**Response:** Agreed. We have restructured the paragraph to provide a smoother transition, which improves the logical flow of the discussion.
- **Specific comment 26:** l. 466-470, but this is neither shown nor is this discussed in terms of its consequences for the ultimate goal, to get a reliable bedload flux estimate

**Response:** Thank you for highlighting this critical issue. We agree that the original paragraph introduced the idea of using acoustic source localization to compensate for amplitude variability, but did not fully elaborate on how this step contributes to improved bedload particle size or flux estimation.

We have clarified this in the revised manuscript conceptual link in Section 4.4 (Improved estimation of particle size, outlook to field application). Specifically, we now explain that one of the major sources of uncertainty in amplitude-based grain size estimation is the spatial variability of impact locations. The PMA system's ability to localize these positions allows for the construction of a spatial compensation function that can correct for this variability.

To improve the overall logical flow, we have also reorganized the structure of the Discussion section. The revised order progresses from system performance and impact location effects to spatial resolution, and finally to the improved estimation of particle size.
- **Specific comment 27:** l. 476-485, the discussion is weak here, it needs to go for more far reaching thoughts, beyond just interpreting possible reasons why this system deviates from earlier/other SPG devices. The title of the study tells us the new system improves the prediction of particle size for bedload measurements. Yet, this is not clearly presented.

**Response:** Thank you for your comment. To clarify, the manuscript already includes a dedicated section titled *4.4 Improved estimation of particle size, outlook to field application* (previously Sect. 4.2), which presents our approach and findings in this regard.
- **Specific comment 28:** l. 505-510, this part is fairly repetitive, it reiterates the results described earlier but lacks an interpretation

**Response:** Thank you for this comment. In the revised version, we have streamlined the text to avoid redundancy and added interpretation to clarify the significance of the findings. Specifically, we emphasize that the relative stability of the exponent  $\beta$  across different impact locations suggests it can be treated as a location-independent parameter, whereas variations in  $\alpha$  indicate the need for spatial compensation when estimating particle size from signal amplitude (Sect. 4.4).

- **Specific comment 29:** l. 513-536, this reads like methods description, certainly not discussion of results.

**Response:** Thank you for the comment. In the revised manuscript, we have relocated this content to a new Methods subsection (Sect. 2.6, “Particle size estimation and model-based correction”), where we outline the estimation procedure, correction workflow, and equations used. The Discussion now focuses on interpreting the implications of the results rather than restating the procedures.

A new results subsection titled “Optimized particle size estimation” has been added (Sect. 3.4) to present the quantitative outcomes of the correction method, including comparisons between optimized and uncorrected estimates.
- **Specific comment 30:** l. 534-538, this does not make sense. Ignoring friction any particle that falls from the same height would have the same impact velocity. This may leap back to my very above comment of using the centre of mass to define the fall height instead of the lower margin of the impactor.

**Response:** Thank you for the comment. We acknowledge that under idealized conditions (ignoring friction and air resistance), any particle dropped from the same center-of-mass height would indeed attain the same impact velocity, regardless of size. In our experimental design, we deliberately controlled for this by defining the drop height from the center of mass of each sphere, not from its base. This approach ensures consistency across different particle size classes and follows established protocols used in previous SPG calibration experiments, thereby facilitating comparative interpretation.

As you correctly noted, this issue overlaps with your earlier Comment 2, which we have also addressed. To avoid redundancy and improve clarity, the original statement in lines 534–538 has been removed from the revised manuscript. We thank the reviewer again for pointing out this issue.
- **Specific comment 31:** l. 540-546, this is a weak interpretation approach, with many “may” and “might” terms but with very little rational arguments that would support the hypothesis. Either add experimental, reference or logical support or skip the attempt of interpretation.

**Response:** Thank you for your valuable feedback. We have rewritten this section to present a clearer and more logically supported interpretation in the revised manuscript (Sect. 4.4).
- **Specific comment 32:** l. 558-560, this is repetitive  
l. 564-566, this is repetitive

**Response:** Thank you for these comments. In the revised manuscript, we have consolidated these points into more concise summary sentences that avoid redundancy while highlighting the key outcome. This revision improves the clarity the section (Sect. 4.3).
- **Specific comment 33:** l. 574, “the decrease of  $R_s$  tends to weaken”, what does that mean? I do not understand.

**Response:** We have revised the wording to clarify that the reduction in  $R_s$  becomes progressively smaller as the number of microphone elements increases, indicating a diminishing return in spatial resolution improvement at higher array densities. This change has been implemented in the revised manuscript to improve clarity (Sect. 4.1).

- **Specific comment 34:** 1. 582, “developed” would be quite a bit an overstatement, better use “presented”  
**Response:** Agreed. we have restructured the conclusion section in the revised manuscript (Sect. 5).
  
- **Specific comment 35:** The fundamental parts of the conclusion chapter are repetitive, giving a mere summary of details described above. A proper conclusion should step beyond the above presented material and ask “what do we know now, or what can we do now?” It shall feed back to the main research question and answer it.  
**Response:** Agreed. In the revised manuscript, we have restructured the conclusion section to explicitly revisit the main research question, summarize the key findings in terms of their scientific and practical value, and highlight the methodological advancements made. We also added a forward-looking paragraph outlining future applications and research directions. We believe this revised conclusion better meets the expectations of a comprehensive and insightful closing section (Sect. 5).

#### **Additional clarifications**

In addition to the above comments, spelling and grammatical errors have been corrected in the manuscript. We look forward to hearing from you in due time regarding our submission and to respond to any further questions and comments you may have.

Sincerely,

Dr. Zheng Chen (on behalf of all co-authors)

Corresponding author

Email: zheng.chen@cdut.edu.cn
